# Supplementary material
Source: PubMed Central journal article supplement (PMC8940607)



**Supplemental Figure 1a-d. Legend. Distribution of Aneurysm Diameter, MMP-9, CRP, and SAA**

Data distributions with Q-Q plots of aneurysm diameter (1a), MMP-9 (1b), SAA (1c), and CRP (1d). Data which is normally distributed will fall close to the grey line. Given the non-normal distribution of all three biomarkers, pre- and post-logarithmic transformation distributions are shown.

Supplemental Figure 1a. Distribution of AAA Diameter

Distribution of AAA

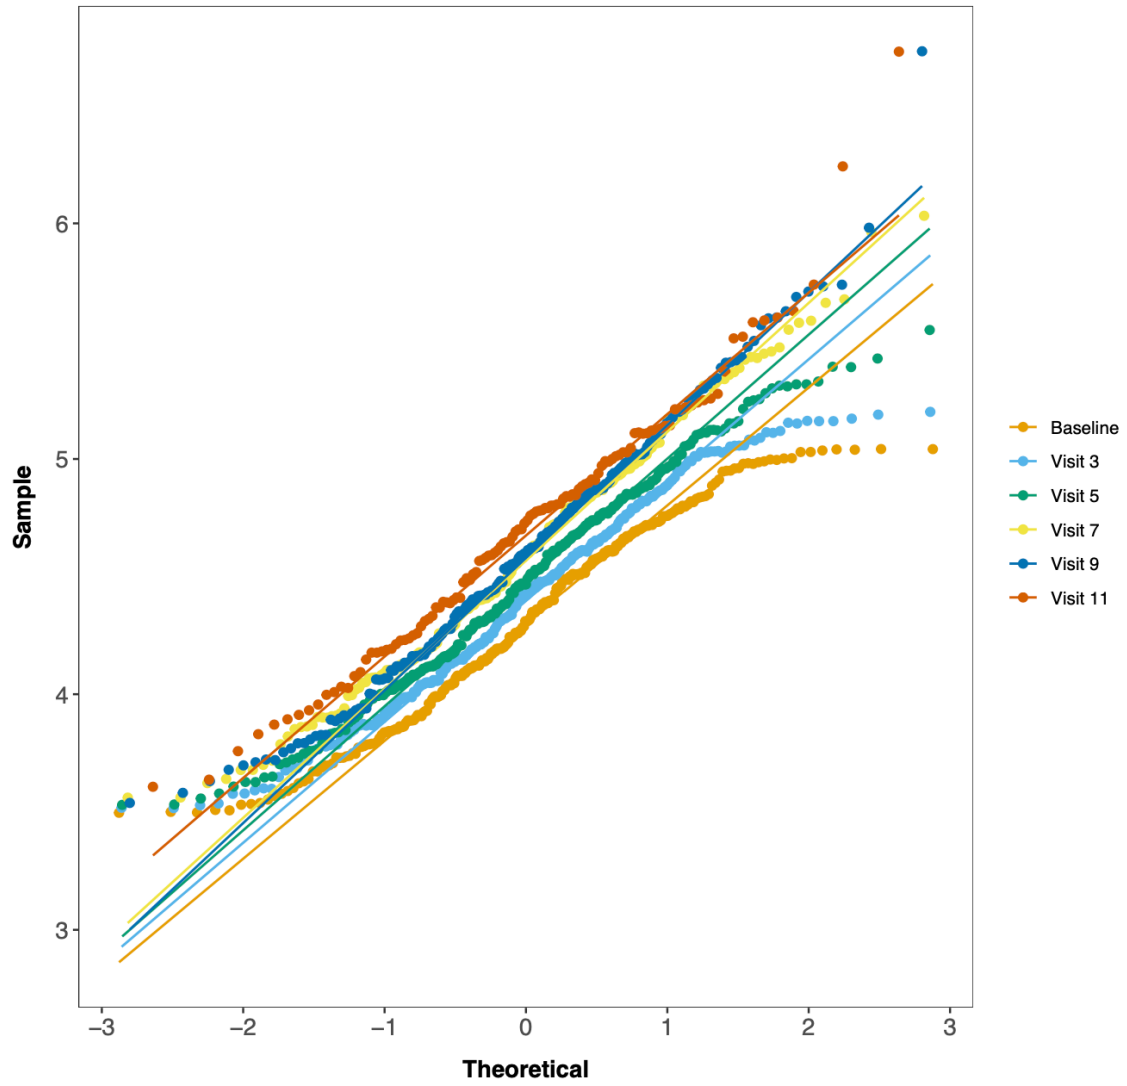

Supplemental Figure 1b. Distribution of MMP-9

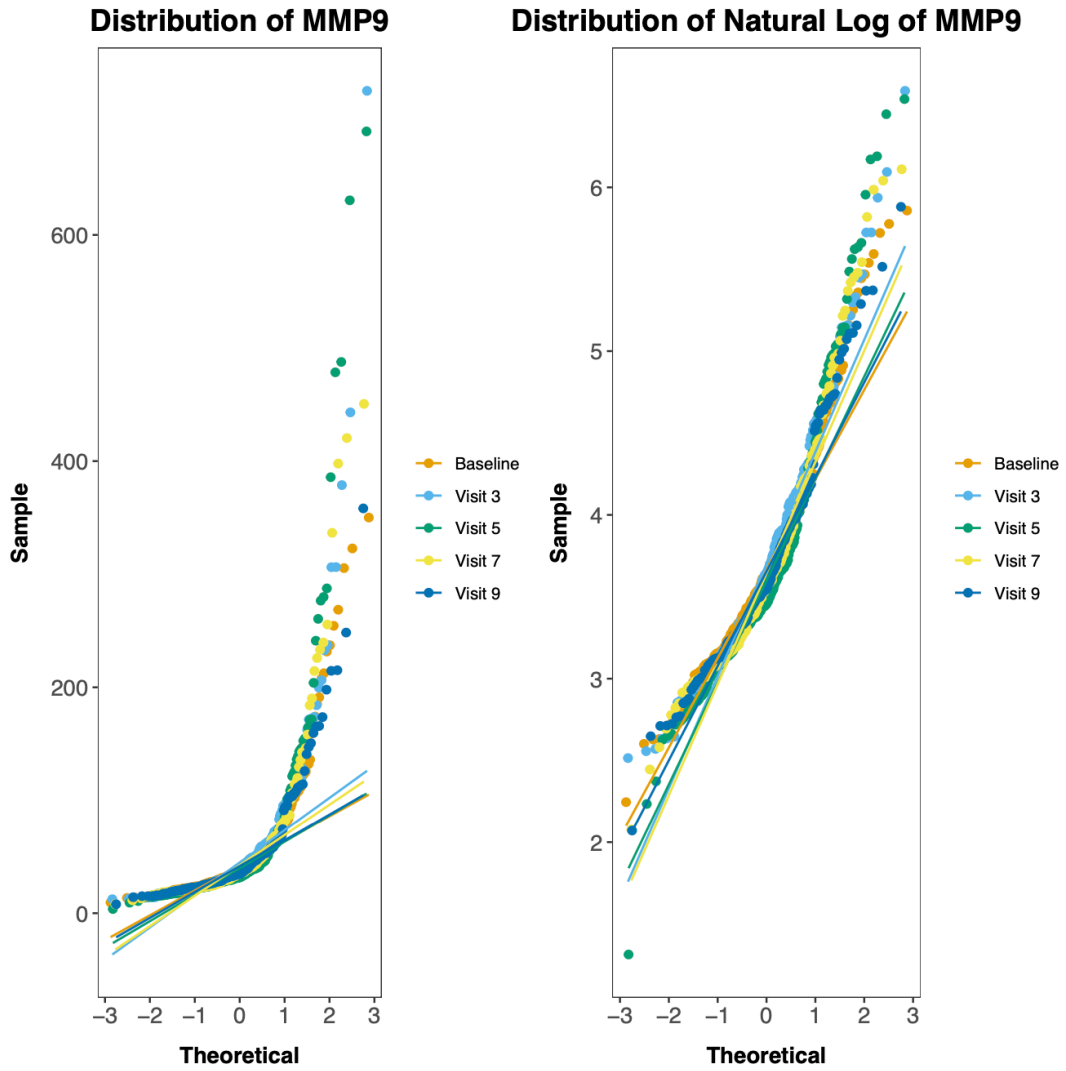

Supplemental Figure 1c. Distribution of SAA

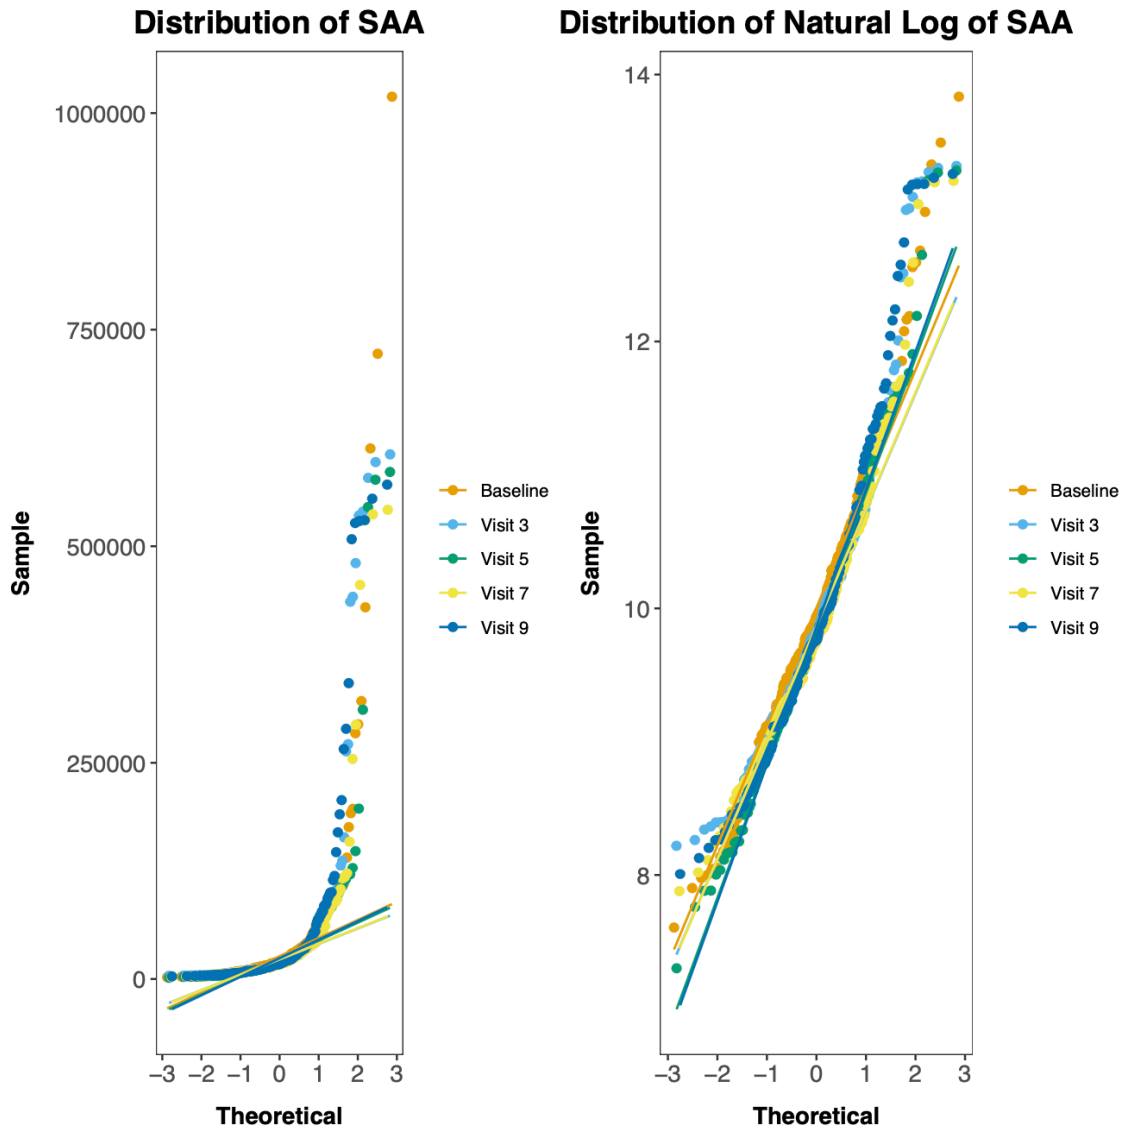

Supplemental Figure 1d. Distribution of CRP

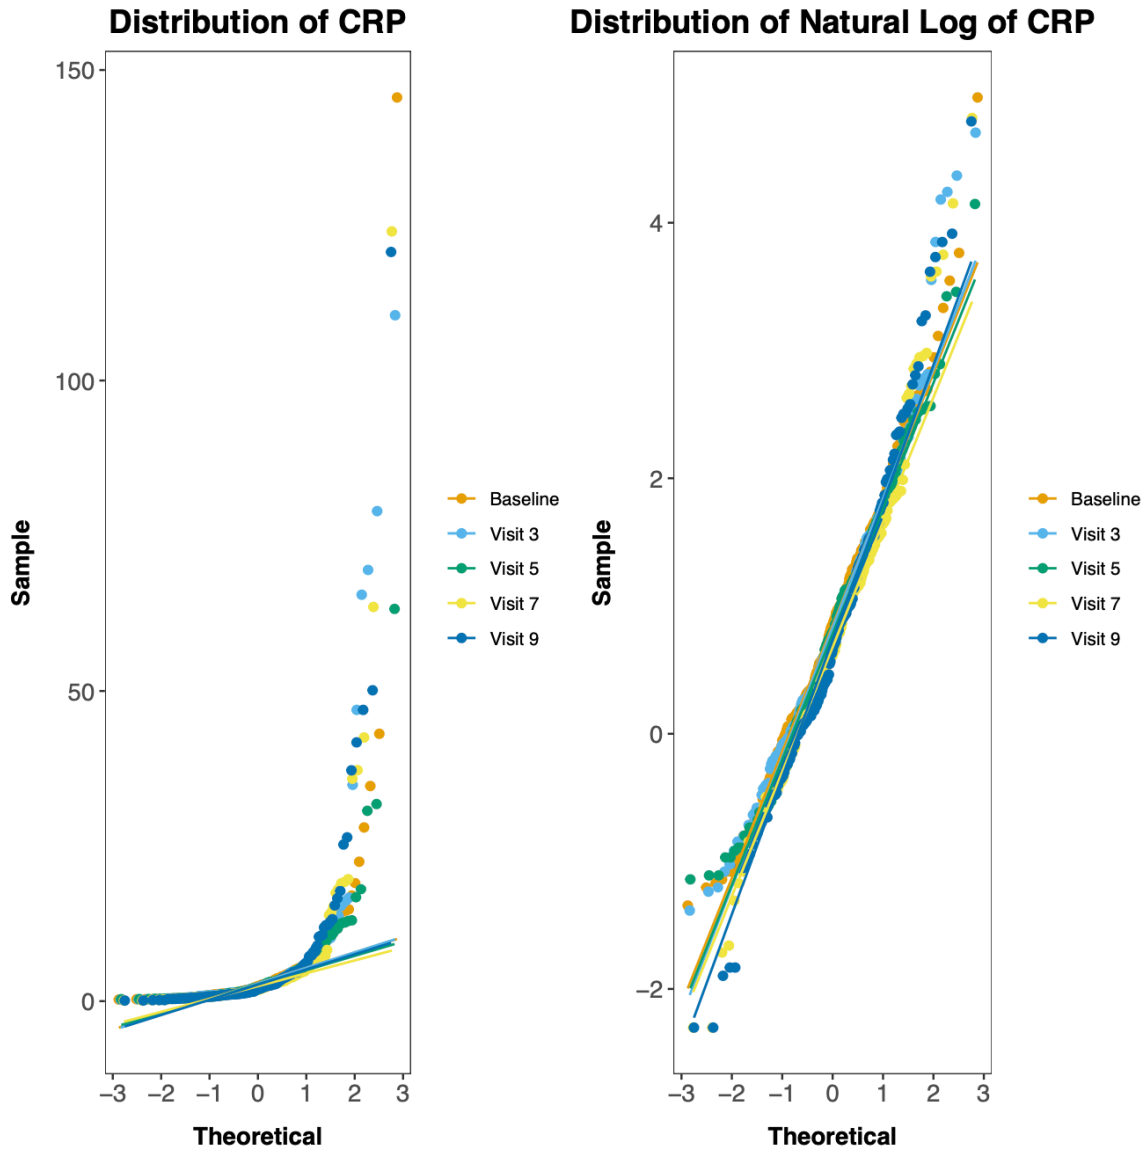

Supplement: NIHMS1750678-supplement-1.pdf [file NIHMS1750678-supplement-1.pdf]
